# Supplementary material for: Tailored dealloying-driven, graphene-boosted defective rutile TiO2−x for long-term lithium storage
Source: Royal Society of Chemistry journal article supplement (doi:10.1039/d1qm00188d), 2021-01-01
Supplement: d1qm00188d1.pdf [file d1qm00188d1.pdf]

## Supporting Information

### **Tailored dealloying-driven, graphene-boosted defective rutile TiO<sub>2-x</sub> for long-term lithium storage**

*Yang Chen*<sup>a</sup>, *Zhangfeng Li*<sup>b</sup>, *Chaofan Yang*<sup>a</sup>, *Dong Qiu*<sup>a</sup>, *Chengli He*<sup>a</sup>, *Zhiyu Jiang*<sup>c</sup>,  
*Xiaoli Cui*<sup>\*,a</sup>

<sup>a</sup> Department of Materials Science, Fudan University, Shanghai 200433, P. R. China

<sup>b</sup> Shanghai Institute of Space Power Sources, Shanghai 200245, P. R. China

<sup>c</sup> Department of Chemistry, Fudan University, Shanghai 200433, P. R. China

\* Corresponding author, E-mail: [xiaolicui@fudan.edu.cn](mailto:xiaolicui@fudan.edu.cn)

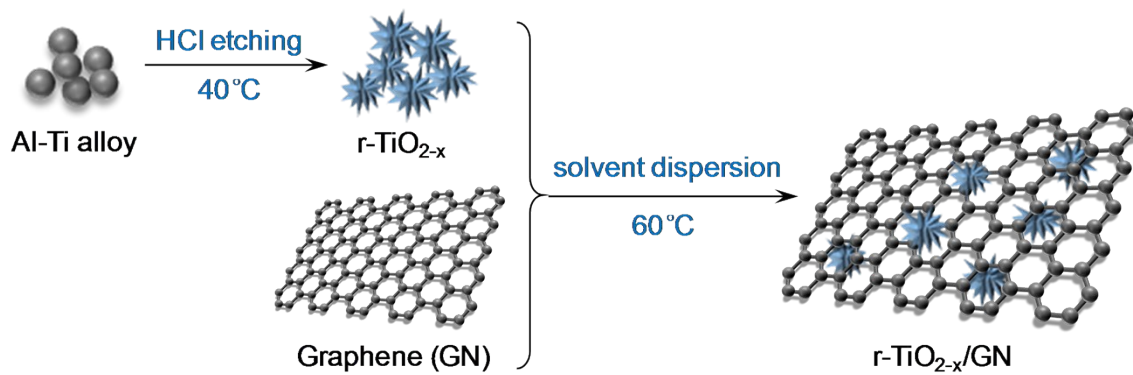

**Figure S1** Schematic illustration of the synthesis of defective rutile TiO<sub>2</sub> (r-TiO<sub>2-x</sub>) and r-TiO<sub>2-x</sub>/graphene (r-TiO<sub>2-x</sub>/GN) composites.

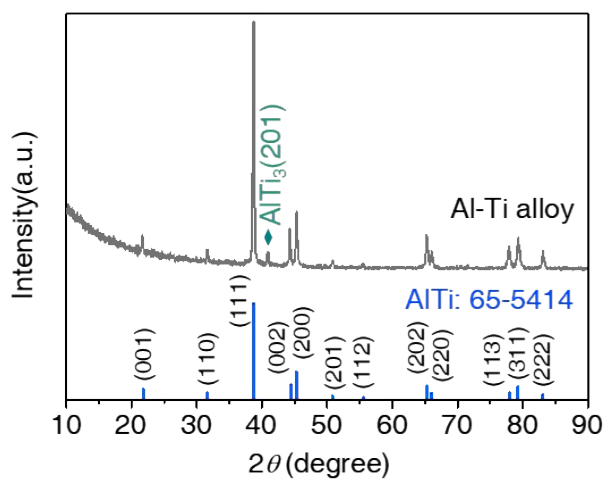

**Figure S2** XRD pattern of Al-Ti alloy raw materials.

Note: The main diffraction peaks of the Al-Ti alloy precursors were assigned to tetragonal AlTi alloy referring to JCPDS card No: 65-5414, adopting the P4/mmm space group. A minor peak emerged at  $2\theta = 40.9^\circ$  was indexed to hexagonal AlTi<sub>3</sub> alloy (JCPDS No: 52-0859), P63/mmc space group. The little AlTi<sub>3</sub> alloy in final Al-Ti alloy products was inevitably introduced in the fabrication process due to a higher diffusion coefficient of Al than that of Ti. The main diffraction peak ( $2\theta = 38.7^\circ$ ) of AlTi alloy corresponded to (111) lattice plane, while the peak at  $2\theta = 40.9^\circ$  of AlTi<sub>3</sub> alloy was corresponding to (201) lattice plane. The intensity of main peaks was 13:1, thus, the content of AlTi alloy was estimated to be 93%.

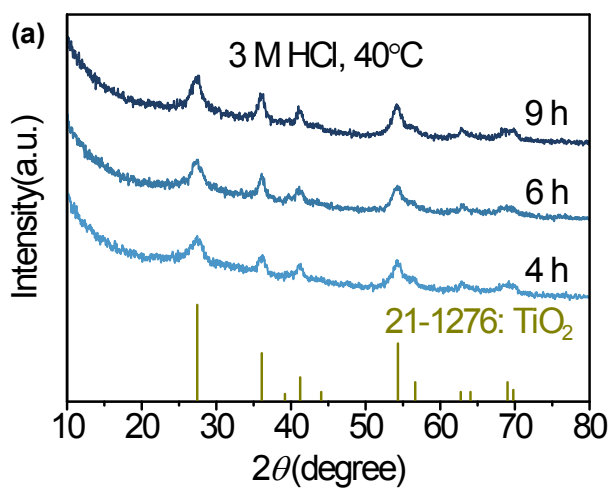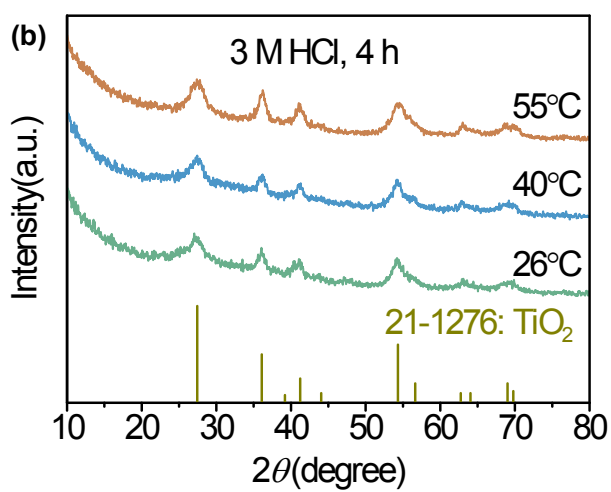

**Figure S3** XRD patterns at different reaction times (a) and temperatures (b). All samples were obtained after centrifuging–rinsing–drying prior to characterizations.

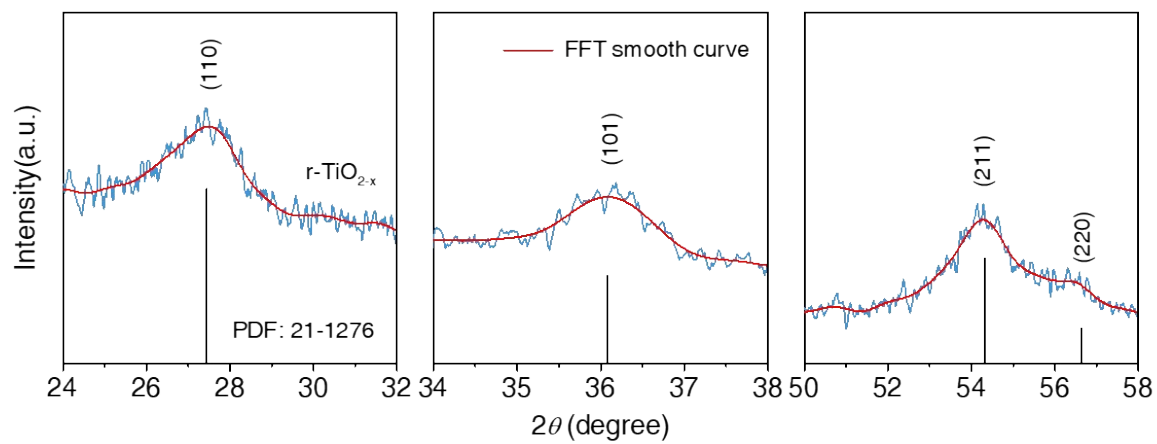

**Figure S4** Partial enlarged XRD pattern of defective rutile  $\text{TiO}_{2-x}$  sample.

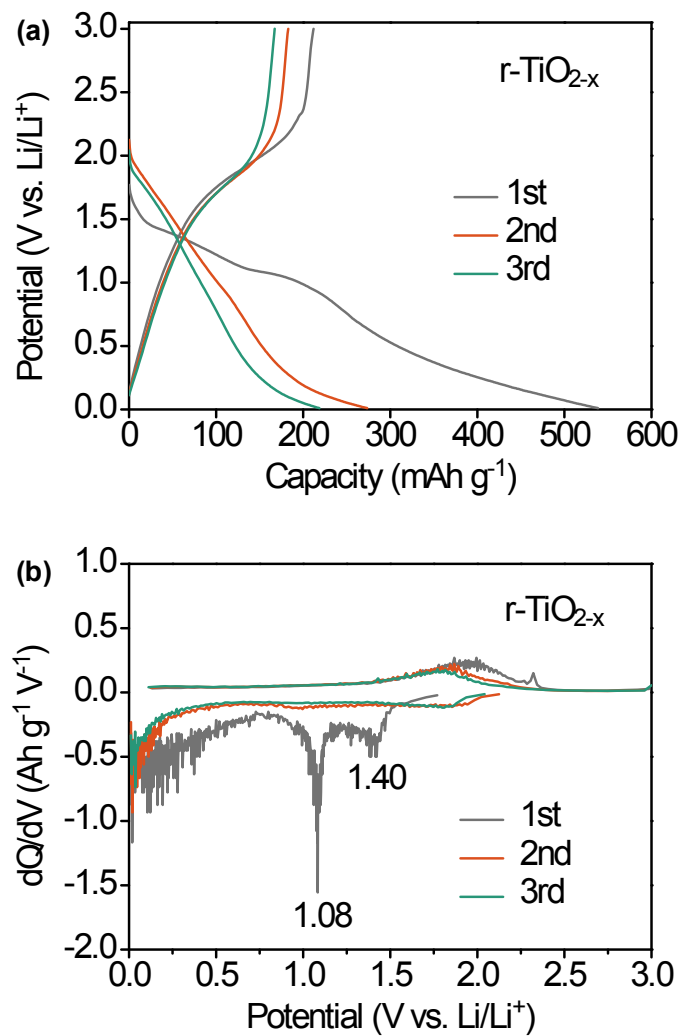

**Figure S5** (a) First three-cycle voltage profiles of defective rutile  $\text{TiO}_{2-x}$  sample at 0.5C and (b) corresponding  $dQ/dV$ -potential plots.

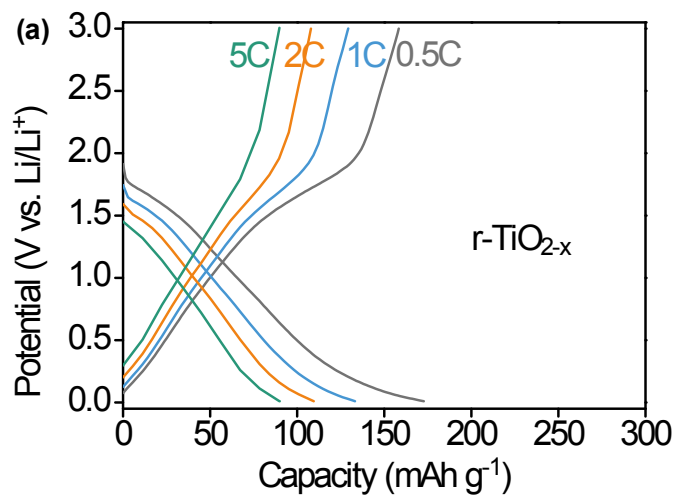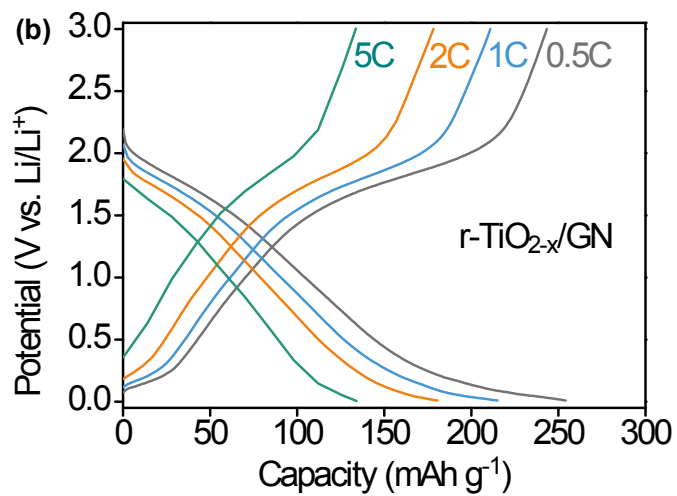

**Figure S6** Voltage profiles of (a)  $r\text{-TiO}_{2-x}$  and (b)  $r\text{-TiO}_{2-x}/\text{GN}$  samples in a potential window of 0.01–3.0 V (vs.  $\text{Li/Li}^+$ ).

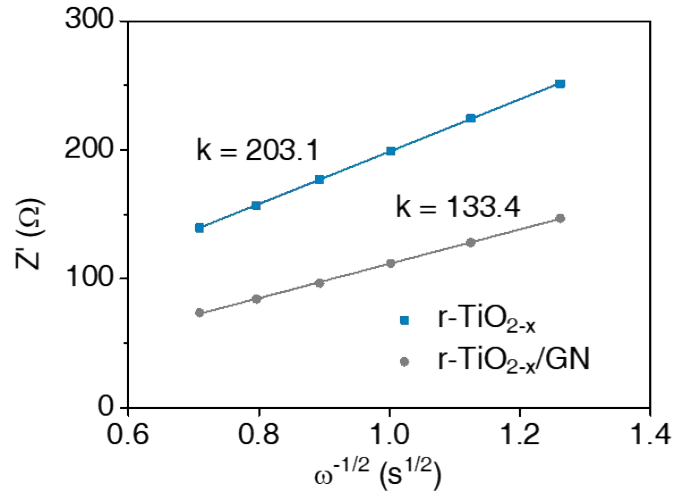

**Figure S7** The relationship between  $Z'$  and  $\omega^{-1/2}$  taken from Nyquist plots.

Note: The low-frequency region in Nyquist plots (Figure 4f) is an inclined line, where the real part of impedance,  $Z'$ , is proportional to  $\omega^{-1/2}$  according to Equation S1 <sup>[1]</sup>. Thus, the Warburg factors ( $\sigma_w$ ) of r-TiO<sub>2-x</sub> and r-TiO<sub>2-x</sub>/GN samples are fitted to be 203.1 and 133.4  $\Omega$  s<sup>-1/2</sup>, respectively.

$$Z' = R_s + R_{ct} + \sigma_w \omega^{-1/2} \quad (S1)$$



**Table S1 The grain sizes of r-TiO<sub>2-x</sub> obtained after different etching time.**

| Etching time (h) | FWHM* (°) | Grain size (nm) |
|------------------|-----------|-----------------|
| 4 h              | 0.867     | 22.7            |
| 6 h              | 0.838     | 23.5            |
| 9 h              | 0.724     | 27.2            |

\* Full width at half maximum (FWHM) of (110) lattice plane at  $2\theta = 27.4^\circ$ .

**Table S2** The electrochemical performance of rutile TiO<sub>2</sub> anode in lithium-ion batteries.

| Electrode Materials                              | Potential window (V vs. Li/Li <sup>+</sup> ) | Reversible capacities (mAh g <sup>-1</sup> / mA g <sup>-1</sup> ) | Initial C.E. (%)    | Rate capability (mAh g <sup>-1</sup> / mA g <sup>-1</sup> ) | Long-term cyclability (mAh g <sup>-1</sup> / mA g <sup>-1</sup> / cycles) | R <sub>ct</sub> (Ω) | Ref./ Year |
|--------------------------------------------------|----------------------------------------------|-------------------------------------------------------------------|---------------------|-------------------------------------------------------------|---------------------------------------------------------------------------|---------------------|------------|
| <b>1 Rutile TiO<sub>2</sub></b>                  |                                              |                                                                   |                     |                                                             |                                                                           |                     |            |
| Lotus-root shaped TiO <sub>2</sub>               | 1.0-3.0                                      | 36/0.5C <sup>(a)</sup>                                            | /                   | 13/2C <sup>(a)</sup>                                        | /                                                                         | 54 <sup>(b)</sup>   | [2]/2020   |
| Nanoporous TiO <sub>2</sub> spheres              | 1.0-3.0                                      | 175 <sup>(b)</sup> /67                                            | /                   | 75/3350                                                     | 129/335/1000                                                              | 149.7               | [3]/2020   |
| TiO <sub>2</sub> nanorods                        | 1.0-3.0                                      | 143/170                                                           | 84.3                | 76/1700                                                     | 99/340/800                                                                | 134.2               | [4]/2019   |
| TiO <sub>2</sub>                                 | 1.0-4.5                                      | 200/34                                                            | 72.7 <sup>(b)</sup> | /                                                           | /                                                                         | /                   | [5]/2019   |
| Mesoporous TiO <sub>2</sub>                      | 1.0-3.0                                      | 220 <sup>(b)</sup> /0.2C <sup>(a)</sup>                           | 59.8 <sup>(b)</sup> | 70 <sup>(b)</sup> /5C <sup>(a)</sup>                        | 164/1C <sup>(a)</sup> /500                                                | 280                 | [6]/2019   |
| Hierarchical TiO <sub>2</sub> microspheres       | 1.0-3.0                                      | 180 <sup>(b)</sup> /84                                            | 62.5 <sup>(b)</sup> | 103/840                                                     | 158/168/200                                                               | 39.1                | [7]/2018   |
| Mesoporous TiO <sub>2</sub>                      | 1.0-3.0                                      | 243/170                                                           | 86.0                | 78/8500                                                     | 80/3400/2000                                                              | 23.1 <sup>(c)</sup> | [8]/2017   |
| TiO <sub>2</sub> inverse opals                   | 1.0-3.0                                      | 168/75                                                            | 38.7 <sup>(b)</sup> | 137/450                                                     | 95/450/5000                                                               | /                   | [9]/2017   |
| TiO <sub>2</sub> nanoparticles                   | 1.0-3.0                                      | 145/168                                                           | 87.2                | 102/1675                                                    | 143/168/80                                                                | /                   | [10]/2016  |
| Hierarchical TiO <sub>2</sub>                    | 1.0-3.0                                      | 212/100                                                           | 68.0 <sup>(b)</sup> | 100/2000                                                    | 220/100/100                                                               | /                   | [11]/2016  |
| Hierarchical TiO <sub>2</sub>                    | 0.01-3.0                                     | 350/100                                                           | 66.0 <sup>(b)</sup> | 150/2000                                                    | 346/100/100                                                               | /                   | [11]/2016  |
| Hierarchical TiO <sub>2</sub>                    | 0.01-3.0                                     | 166/100                                                           | 46.4                | 85/1675                                                     | 190/100/200                                                               | 100 <sup>(b)</sup>  | [12]/2016  |
| Hierarchical mesoporous TiO <sub>2</sub> spheres | 1.0-3.0                                      | 186/85                                                            | 61.0                | 125/1700                                                    | /                                                                         | 44.3                | [13]/2016  |
| TiO <sub>2</sub> nanorod arrays                  | 1.0-2.6                                      | 150 <sup>(d)</sup> /5 <sup>(e)</sup>                              | 38.9                | 70 <sup>(d)</sup> /200 <sup>(e)</sup>                       | 100 <sup>(d)</sup> /100 <sup>(e)</sup> /100                               | /                   | [14]/2016  |
| Dandelion-like TiO <sub>2</sub>                  | 1.0-2.5                                      | 269/68                                                            | 79.8                | 116/6800                                                    | /                                                                         | 70                  | [15]/2015  |
| TiO <sub>2</sub> submicroboxes                   | 1.0-3.0                                      | 238/170                                                           | 44.0                | 68/5100                                                     | 140 <sup>(b)</sup> /850/500                                               | /                   | [16]/2015  |
| <b>2 Rutile TiO<sub>2</sub>/C composites</b>     |                                              |                                                                   |                     |                                                             |                                                                           |                     |            |
| TiO <sub>2</sub> /C nanosheet                    | 1.0-3.0                                      | 200/16.8                                                          | 61.4                | 43/5040                                                     | 110/840/2000                                                              | 168                 | [17]/2019  |

|                                                      |          |                         |                     |          |               |                   |           |
|------------------------------------------------------|----------|-------------------------|---------------------|----------|---------------|-------------------|-----------|
| Carbon/TiO <sub>2</sub> spheres                      | 0.01-3.0 | 251/200                 | /                   | 200/1000 | 219/500/200   | 50 <sup>(b)</sup> | [18]/2016 |
| TiO <sub>2</sub> mesocrystals/reduced graphene oxide | 1.0-3.0  | 215/168                 | 72.4                | 140/6720 | 150/3360/1000 | /                 | [19]/2015 |
| TiO <sub>2</sub> nanoneedle/graphene                 | 1.0-3.0  | 170 <sup>(b)</sup> /168 | 83.0 <sup>(b)</sup> | 149/840  | /             | 65 <sup>(b)</sup> | [20]/2015 |
| TiO <sub>2</sub> nanobundles/reduced graphene oxides | 0.01-3.0 | 175 <sup>(b)</sup> /200 | 54.4                | 78/2000  | 200/200/500   | 43.1              | [21]/2014 |
| TiO <sub>2</sub> /carbon nanofibers                  | 1.0-3.0  | /                       | /                   | 80/4200  | 190/100/500   | 32 <sup>(b)</sup> | [22]/2014 |

### 3 Heteroatom-doped rutile TiO<sub>2</sub>

|                                               |          |                         |                     |                       |                            |                     |           |
|-----------------------------------------------|----------|-------------------------|---------------------|-----------------------|----------------------------|---------------------|-----------|
| Sn-doped TiO <sub>2</sub> hollow nanocrystals | 0.01-3.0 | 251/100                 | 56.6                | 156/5000              | 110/5000/500               | 64.1 <sup>(c)</sup> | [23]/2018 |
| Nb-doped TiO <sub>2</sub>                     | 1.0-3.0  | 167/50                  | 56.1                | 76/1000               | 100/250/80                 | /                   | [24]/2018 |
| Nb-doped TiO <sub>2</sub>                     | 0.05-3.0 | 380/50                  | 54.0                | 234/1000              | 280/250/80                 | /                   | [24]/2018 |
| Nb-doped TiO <sub>2</sub> mesocrystals        | 1.0-3.0  | 199/0.5C <sup>(a)</sup> | 70.3 <sup>(b)</sup> | 96/40C <sup>(a)</sup> | 142/5C <sup>(a)</sup> /600 | 27                  | [25]/2017 |
| Nb-doped TiO <sub>2</sub>                     | 1.0-3.0  | 220/170                 | 68.0                | 120/16750             | 176/335/1000               | /                   | [26]/2016 |
| B-doped TiO <sub>2</sub> submicrospheres      | 1.0-3.0  | 166/168                 | 62.1 <sup>(b)</sup> | 72/3350               | 190/335/500                | 259.4               | [27]/2014 |

### 4 Defective rutile TiO<sub>2</sub>

|                                                        |          |                       |      |                        |                             |                     |           |
|--------------------------------------------------------|----------|-----------------------|------|------------------------|-----------------------------|---------------------|-----------|
| TiO <sub>2-x</sub>                                     | 1.0-3.0  | 254/100               | 93.8 | 220/300                | /                           | 34.4                | [28]/2019 |
| TiO <sub>2-x</sub> /graphene quantum dots              | 1.0-3.0  | 169/5C <sup>(a)</sup> | 67.6 | 145/15C <sup>(a)</sup> | 160/10C <sup>(a)</sup> /500 | 54.6                | [29]/2018 |
| Ti <sup>3+</sup> self-doped TiO <sub>2</sub> nanorods  | 1.0-3.0  | 169/168               | 72.6 | 92/8400                | 92/8400/1000                | 48.4 <sup>(c)</sup> | [30]/2015 |
| Hydrogenated TiO <sub>2</sub> nanoparticles            | 1.0-3.0  | 180/16.8              | 82.6 | 129/1680               | /                           | 27.2                | [31]/2014 |
| Ti <sup>3+</sup> self-doped TiO <sub>2</sub> /graphyne | 0.01-3.0 | 195/84                | 42.0 | 134/840                | 157/168/1400                | 11.6                | This work |

Notes: <sup>(a)</sup>Unclear definition of 1C specific current <sup>(b)</sup>Estimated according to the figures.

<sup>(c)</sup>Unit:  $\Omega \text{ cm}^{-2}$ . <sup>(d)</sup>Unit:  $\mu\text{Ah cm}^{-2}$ . <sup>(e)</sup>Unit:  $\mu\text{A cm}^{-2}$ . “/” stands for no data given.

## References

- [1] Lu, K.; Hu, Z.; Xiang, Z.; Ma, J.; Song, B.; Zhang, J.; Ma, H., Cation intercalation in manganese oxide nanosheets: effects on lithium and sodium storage. *Angew. Chem. Int. Ed.* **2016**, *55*, 10448-10452.
- [2] Choi, S. I.; Jung, E.-J.; Park, M.; Shin, H.-S.; Huh, S.; Won, Y. S., Phase-dependent performance of lotus-root shaped TiO<sub>2</sub> anode for lithium-ion batteries (LIBs). *Appl. Surf. Sci.* **2020**, *508*, 145237.
- [3] Ma, D.; Li, K.; Pan, J. H., Ultraviolet-induced interfacial crystallization of uniform nanoporous biphasic TiO<sub>2</sub> spheres for durable lithium-ion battery. *ACS Appl. Energy Mater.* **2020**, *3* (5), 4186-4192.
- [4] Lee, T. Y.; Lee, C. Y.; Chiu, H. T., Vapor-solid reaction growth of rutile TiO<sub>2</sub> nanorods and nanowires for Li-ion-battery electrodes. *ACS Omega* **2019**, *4* (14), 16217-16225.
- [5] Christensen, C. K.; Mamakhel, M. A. H.; Balakrishna, A. R.; Iversen, B. B.; Chiang, Y. M.; Ravnsbaek, D. B., Order-disorder transition in nano-rutile TiO<sub>2</sub> anodes: a high capacity low-volume change Li-ion battery material. *Nanoscale* **2019**, *11* (25), 12347-12357.
- [6] Ambade, R. B.; Koh, K. H.; Ambade, S. B.; Eom, W.; Noh, S. H.; Koo, C. M.; Kim, S. H.; Han, T. H., Kinetically controlled low-temperature solution-processed mesoporous rutile TiO<sub>2</sub> for high performance lithium-ion batteries. *J. Ind. Eng. Chem.* **2019**, *80*, 667-676.
- [7] Chen, L.; Yang, S., Hierarchical rutile TiO<sub>2</sub> microspheres assembled by nanorods with nanocavities and their lithium-ion storage properties. *J. Nanopart. Res.* **2018**, *20* (2), 32.
- [8] Wang, D.; Shan, Z.; Na, R.; Huang, W.; Tian, J., Solvothermal synthesis of hedgehog-like mesoporous rutile TiO<sub>2</sub> with improved lithium storage properties. *J. Power Sources* **2017**, *337*, 11-17.
- [9] McNulty, D.; Carroll, E.; O'Dwyer, C., Rutile TiO<sub>2</sub> inverse opal anodes for Li-ion batteries with long cycle life, high-rate capability, and high structural stability. *Adv. Energy Mater.* **2017**, *7* (12), 1602291.
- [10] Huang, J.; Fang, F.; Huang, G.; Sun, H.; Zhu, J.; Yu, R., Engineering the surface of rutile TiO<sub>2</sub> nanoparticles with quantum pits towards excellent lithium storage. *RSC Adv.* **2016**, *6* (70), 66197-66203.

- [11] Hong, Z.; Hong, J.; Xie, C.; Huang, Z.; Wei, M., Hierarchical rutile TiO<sub>2</sub> with mesocrystalline structure for Li-ion and Na-ion storage. *Electrochim. Acta* **2016**, *202*, 203-208.
- [12] Gao, R.; Jiao, Z.; Wang, Y.; Xu, L.; Xia, S.; Zhang, H., Eco-friendly synthesis of rutile TiO<sub>2</sub> nanostructures with controlled morphology for efficient lithium-ion batteries. *Chem. Eng. J.* **2016**, *304*, 156-164.
- [13] Wang, W. L.; Park, J.-Y.; Nguyen, V. H.; Jin, E. M.; Gu, H.-B., Hierarchical mesoporous rutile TiO<sub>2</sub>/C composite nanospheres as lithium-ion battery anode materials. *Ceram. Int.* **2016**, *42* (1), 598-606.
- [14] Liu, G.; Zhang, S.; Wu, X.; Lin, R., Fabrication of rutile TiO<sub>2</sub> nanorod arrays on a copper substrate for high-performance lithium-ion batteries. *RSC Adv.* **2016**, *6* (60), 55671-55675.
- [15] Bai, Y.; Liu, Z.; Zhang, N.; Sun, K., One-pot synthesis of 3-D dandelion-like architectures constructed by rutile TiO<sub>2</sub> nanorods grown along [001] axis for high-rate lithium ion batteries. *RSC Adv.* **2015**, *5* (27), 21285-21289.
- [16] Yu, X. Y.; Wu, H. B.; Yu, L.; Ma, F. X.; Lou, X. W., Rutile TiO<sub>2</sub> submicroboxes with superior lithium storage properties. *Angew. Chem. Int. Ed.* **2015**, *54* (13), 4001-4004.
- [17] Guan, Z.; Wang, X.; Li, T.; Zhu, Q.; Jia, M.; Xu, B., Facile synthesis of rutile TiO<sub>2</sub>/carbon nanosheet composite from MAX phase for lithium storage. *J. Mater. Sci. Technol.* **2019**, *35* (9), 1977-1981.
- [18] Zeng, T.; Ji, P.; Hu, X.; Li, G., Nano-Sn doped carbon-coated rutile TiO<sub>2</sub> spheres as a high capacity anode for Li-ion battery. *RSC Adv.* **2016**, *6* (54), 48530-48536.
- [19] Lan, T.; Qiu, H.; Xie, F.; Yang, J.; Wei, M., Rutile TiO<sub>2</sub> mesocrystals/reduced graphene oxide with high-rate and long-term performance for lithium-ion batteries. *Sci. Rep.* **2015**, *5*, 8498.
- [20] Gan, Y.; Zhu, L.; Qin, H.; Xia, Y.; Xiao, H.; Xu, L.; Ruan, L.; Liang, C.; Tao, X.; Huang, H.; Zhang, W., Hybrid nanoarchitecture of rutile TiO<sub>2</sub> nanoneedle/graphene for advanced lithium-ion batteries. *Solid State Ionics* **2015**, *269*, 44-50.
- [21] Zhen, M.; Guo, X.; Gao, G.; Zhou, Z.; Liu, L., Rutile TiO<sub>2</sub> nanobundles on reduced graphene oxides as anode materials for Li ion batteries. *Chem. Commun.* **2014**, *50* (80), 11915-11918.
- [22] Kong, J.; Wei, Y.; Zhao, C.; Toh, M. Y.; Yee, W. A.; Zhou, D.; Phua, S. L.; Dong, Y.; Lu, X., Growth of rutile TiO<sub>2</sub> on the convex surface of nanocylinders: from

nanoneedles to nanorods and their electrochemical properties. *Nanoscale* **2014**, *6* (8), 4352-4360.

- [23] Jiao, S.; Lian, G.; Jing, L.; Xu, Z.; Wang, Q.; Cui, D.; Wong, C.-P., Sn-doped rutile TiO<sub>2</sub> hollow nanocrystals with enhanced lithium-ion batteries performance. *ACS Omega* **2018**, *3* (1), 1329-1337.
- [24] Gardecka, A. J.; Lübke, M.; Armer, C. F.; Ning, D.; Reddy, M. V.; Williams, A. S.; Lowe, A.; Liu, Z.; Parkin, I. P.; Darr, J. A., Nb-doped rutile titanium dioxide nanorods for lithium-ion batteries. *Solid State Sci.* **2018**, *83*, 115-121.
- [25] Lan, T.; Zhang, W.; Wu, N. L.; Wei, M., Nb-doped rutile TiO<sub>2</sub> mesocrystals with enhanced lithium storage properties for lithium ion battery. *Chem. Eur. J.* **2017**, *23* (21), 5059-5065.
- [26] Usui, H.; Domi, Y.; Yoshioka, S.; Kojima, K.; Sakaguchi, H., Electrochemical lithiation and sodiation of Nb-doped rutile TiO<sub>2</sub>. *ACS Sustain. Chem. Eng.* **2016**, *4* (12), 6695-6702.
- [27] Tian, H.; Xin, F.; Tan, X.; Han, W., High lithium electroactivity of boron-doped hierarchical rutile submicrosphere TiO<sub>2</sub>. *J. Mater. Chem. A* **2014**, *2* (27), 10599-10606.
- [28] Kang, S. H.; Jo, Y. N.; Prasanna, K.; Santhoshkumar, P.; Joe, Y. C.; Vediappan, K.; Gnanamuthu, R.; Lee, C. W., Bandgap tuned and oxygen vacant TiO<sub>2-x</sub> anode materials with enhanced electrochemical properties for lithium ion batteries. *J. Ind. Eng. Chem.* **2019**, *71*, 177-183.
- [29] Zhang, W.; Xu, T.; Liu, Z.; Wu, N. L.; Wei, M., Hierarchical TiO<sub>2-x</sub> imbedded with graphene quantum dots for high-performance lithium storage. *Chem. Commun.* **2018**, *54* (12), 1413-1416.
- [30] Chen, J.; Song, W.; Hou, H.; Zhang, Y.; Jing, M.; Jia, X.; Ji, X., Ti<sup>3+</sup> self-doped dark rutile TiO<sub>2</sub> ultrafine nanorods with durable high-rate capability for lithium-ion batteries. *Adv. Funct. Mater.* **2015**, *25* (43), 6793-6801.
- [31] Qiu, J.; Li, S.; Gray, E.; Liu, H.; Gu, Q.-F.; Sun, C.; Lai, C.; Zhao, H.; Zhang, S., Hydrogenation synthesis of blue TiO<sub>2</sub> for high-performance lithium-ion batteries. *J. Phys. Chem. C* **2014**, *118* (17), 8824-8830.
